# Supplementary material
Source: PubMed Central journal article supplement (PMC5224936)

**a**

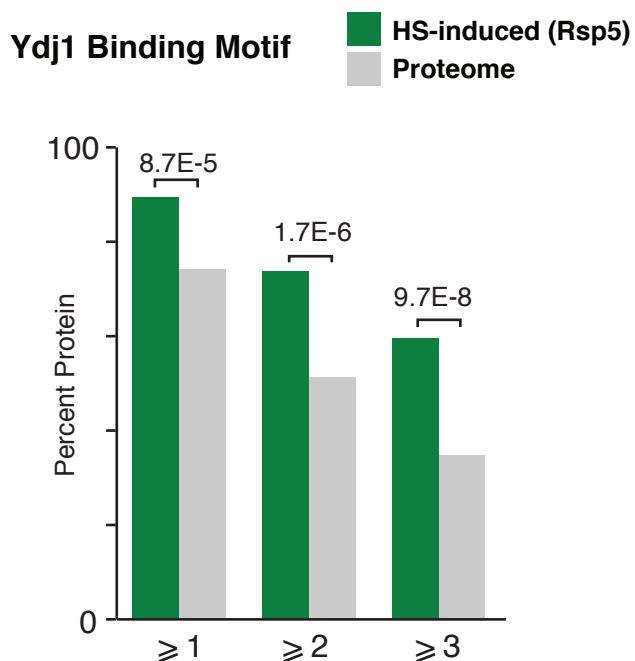

**c**

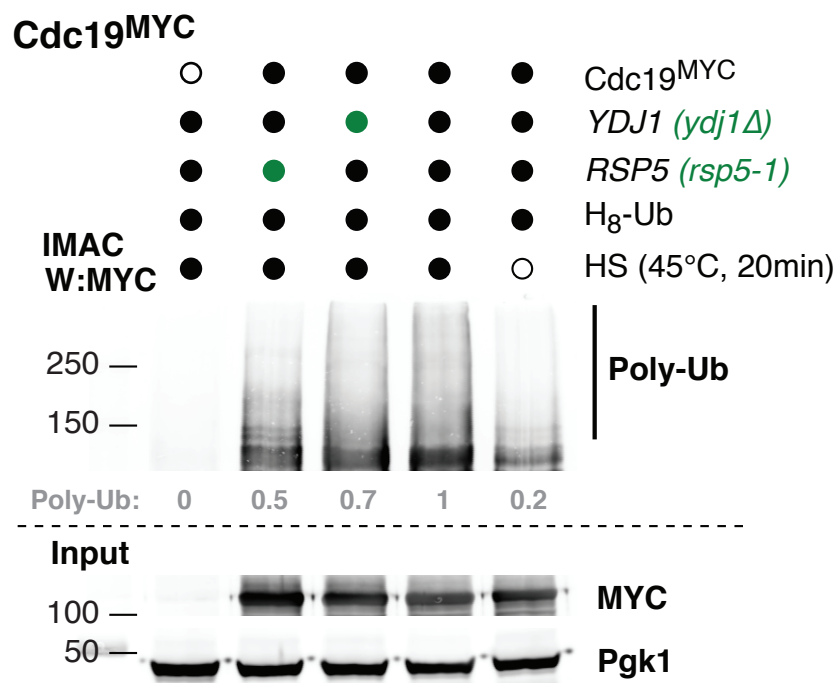

**b**

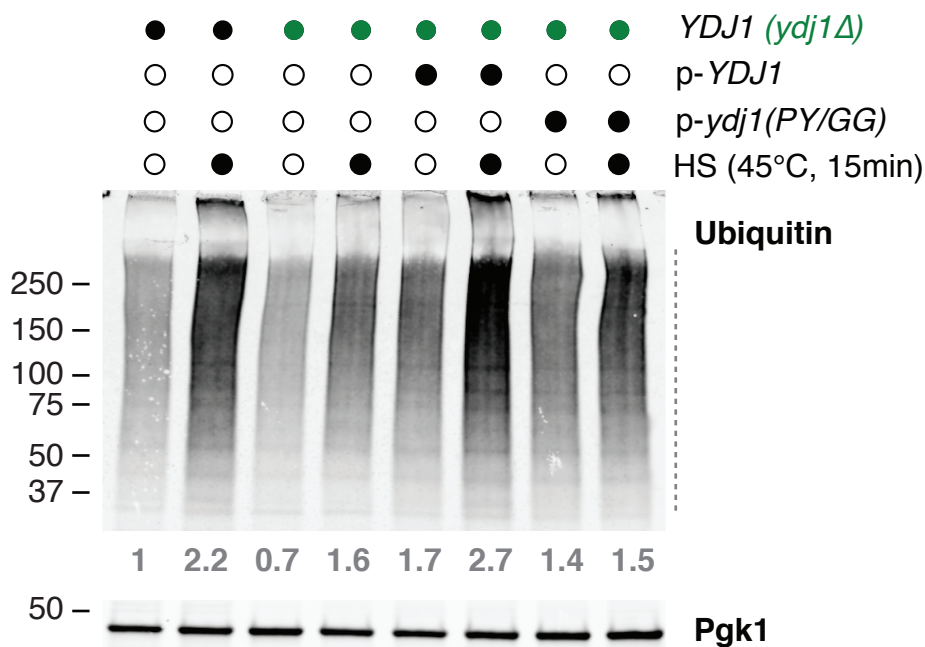

Supplement: NIHMS6319-supplement-Figure_S6.pdf [file NIHMS6319-supplement-Figure_S6.pdf]

# Figure S8

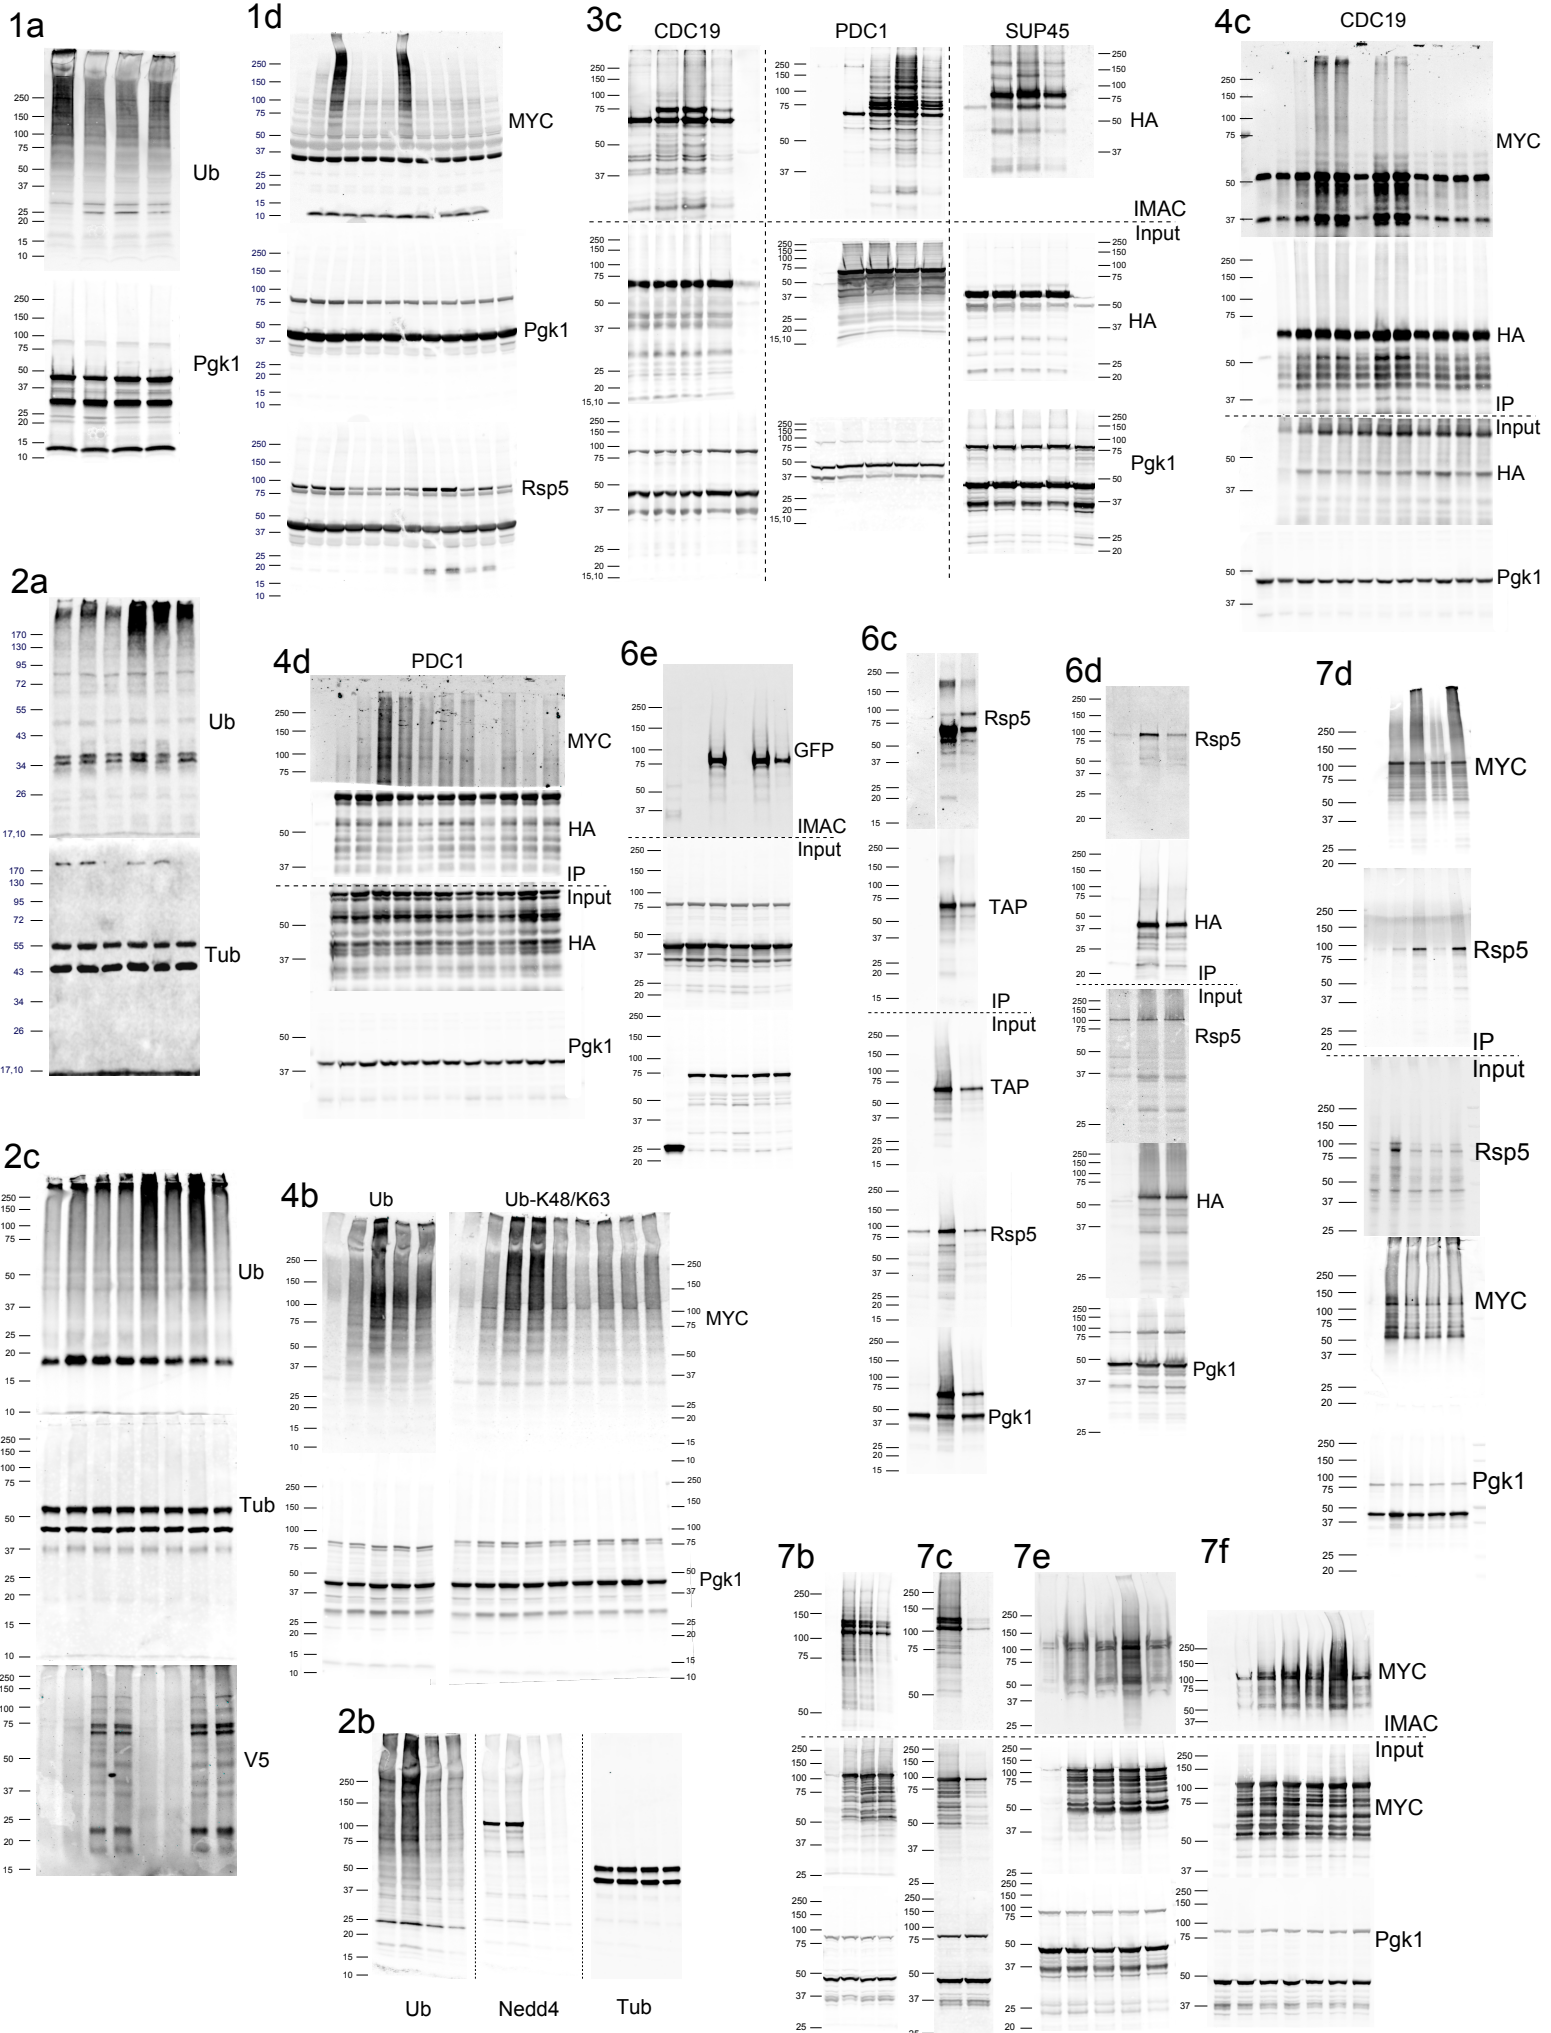

Supplement: NIHMS6319-supplement-Figure_S8.pdf [file NIHMS6319-supplement-Figure_S8.pdf]
